# Supplementary material
Source: publisher figshare collection journal article supplement (https://sage.figshare.com/ndownloader/files/15254321)
Supplement: Supplementary file 1 [file 15254321]

| Subjects | Age (y) | Sex | Race      | BMI | Alcohol (units/month) | Smoking             | Medical history                                                                                                     | Medication use                                                                                | Presenting symptoms                   | Findings DBE                            | Findings Pathology   |
|----------|---------|-----|-----------|-----|-----------------------|---------------------|---------------------------------------------------------------------------------------------------------------------|-----------------------------------------------------------------------------------------------|---------------------------------------|-----------------------------------------|----------------------|
| 1        | 50      | M   | Caucasian | 20  | 4-5 units/month       | -                   | 1964: resection of small bowel                                                                                      | Methadone                                                                                     | Blood loss                            | Multiple polyps in proximal small bowel | Peutz Jeghers Polyps |
| 2        | 38      | F   | Caucasian | 21  | -                     | 15 cigarettes/day   | BCRA1 gene mutation                                                                                                 | Pancreatic enzymes<br>Eye drops                                                               | Diarrhea                              | -                                       | -                    |
| 3        | 44      | F   | na        | na  | na                    | na                  | -                                                                                                                   | -                                                                                             | Abdominal pain                        | -                                       | -                    |
| 4        | 61      | F   | Caucasian | 24  | 3 units/day           | -                   | Atrial fibrillation                                                                                                 | Proton pump inhibitor,<br>Antiplatelet drug<br>Paracetamol<br>Acenocoumarol<br>Benzodiazepine | Diarrhea; weight loss                 | Polyp in proximal duodenum              | -                    |
| 5        | 26      | F   | Caucasian | na  | -                     | 1-10 cigarettes/day | -                                                                                                                   | -                                                                                             | Abdominal pain                        | -                                       | -                    |
| 6        | 39      | M   | Black     | na  | na                    | na                  | Diabetes type 2                                                                                                     | Metformin<br>Proton pump inhibitor<br>Antiplatelet drug                                       | Abdominal pain                        | -                                       | -                    |
| 7        | 67      | F   | Caucasian | 16  | -                     | Yes                 | 1997: liver failure based on hepatitis B infection wherefore liver transplantation<br>2005: osteopenia<br>Mild COPD | Proton pump inhibitor<br>Immunosuppressive (Ciclosporin)<br>Calcium/Vitamin D                 | Iron deficiency anemia                | -                                       | -                    |
| 8        | 47      | F   | Caucasian | 15  | -                     | -                   | Fibromyalgia<br>Endometriosis                                                                                       | Budesonide<br>H <sub>2</sub> antagonist<br>Antispasmodic                                      | Diarrhea; weight loss; abdominal pain | -                                       | -                    |
| 9        | 54      | M   | Caucasian | 32  | 6 units/week          | -                   | Hypertension<br>Cholecystectomy<br>Peripheral arterial disease                                                      | -                                                                                             | Diarrhea                              | Erosive abnormalities in jejunum        | Reflux esophagitis   |
| 10       | 53      | M   | Caucasian | na  | 2                     | 35                  | 2007:                                                                                                               | Antiplatelet drug                                                                             | Iron deficiency                       | Venectasia                              | -                    |

|    |    |   |           |    |             |                   |                                                        |                                                                                                                                           |                        |                                                                                 |                                     |
|----|----|---|-----------|----|-------------|-------------------|--------------------------------------------------------|-------------------------------------------------------------------------------------------------------------------------------------------|------------------------|---------------------------------------------------------------------------------|-------------------------------------|
|    |    |   |           |    | units/day   | cigarettes/day    | cerebrovascular accident<br>80% stenosis of a. carotid | Proton pump inhibitor<br>Cholesterol inhibitor<br>Iron supplement                                                                         | anemia                 |                                                                                 |                                     |
| 11 | 50 | M | Caucasian | 21 | 2 units/day | 23 cigarettes/day | Barrett's esophagus                                    | Cholesterol inhibitor<br>Proton pump inhibitor                                                                                            | Weight loss            | Small polyp in colon                                                            | -                                   |
| 12 | 55 | M | Caucasian | 29 | -           | 23 cigarettes/day | Diabetes type 1<br>hypertension                        | Insulin pump<br>Proton pump inhibitor<br>Antiplatelet drug<br>Fludrocortisone<br>ACE inhibitor<br>Cholesterol inhibitor<br>Hydrocortisone | Iron deficiency anemia | -                                                                               | -                                   |
| 13 | 74 | F | Caucasian | na | na          | na                | Jejunioileal bypass surgery for obesity                | Na                                                                                                                                        | Iron deficiency anemia | Extensive ulcerative abnormalities in distal ileum<br>obstructive mass in cecum | Ulcerative lesion in distal ileum * |
| 14 | 62 | M | na        | 27 | 1 unit/day  | 10 cigarettes/day | Peripheral arterial disease                            | Antiplatelet drug<br>Proton pump inhibitor<br>Iron supplements<br>Cholesterol inhibitor<br>Tramadol                                       | Iron deficiency anemia | -                                                                               | -                                   |

**Supplementary Table 1: Baseline characteristics per individual subject.** na = information is not available; - = no specialties, \*no biopsies were taken during DBE, the mass was diagnosed as a cecum tumor during follow up endoscopy, m = male, f = female, DBE = double balloon enteroscopy

| Target            | Forward                     | Reverse                          | Reference                 |
|-------------------|-----------------------------|----------------------------------|---------------------------|
| <b>16S</b>        | 5'-CGGTGGAATACGTTCCCGG-3'   | 5'-TACGGCTACCTTGTTACGACTT-3'     | <sup>1-3</sup>            |
| <b>UreA</b>       | 5'-ATGAAACTCACCCCAAAGA-3'   | 5'-TTCACCTCAAAGAAATGGAAGTGTGA-3' | <sup>4, 5</sup>           |
| <b>VacA S1/S1</b> | 5'-ATGGAAATACAACAAACACAC-3' | 5'-CTGCTTGAATGCGCCAAAC-3'        | Adapted from <sup>6</sup> |
| <b>ACTB</b>       | 5'-CTGGAACGGTGAAGGTGACA-3'  | 5'-AAGGGACTTCCTGTAACAATGCA-3'    | <sup>7</sup>              |

**Supplementary Table S2: Primers used for DNA amplification**

### Supplementary figures

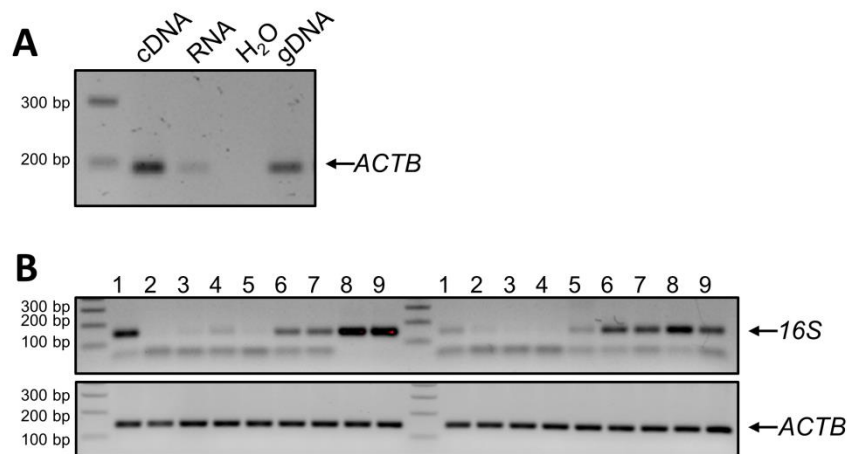

**Supplementary Figure S1. Bacterial abundance, unlike human genomic content, fluctuates along the intestinal tract. (A)** Human *ACTB* primers identify the gene encoding beta-Actin in both human copyDNA (cDNA) and genomic DNA (gDNA) isolated from human colorectal epithelial cancer cell lines CACO2. **(B)** Two representative examples of comparison of bacterial DNA (16S) and human DNA (*ACTB*) along the intestinal tract from two subjects (S1 and S2). 1: distal oesophagus; 2: antrum; 3: proximal duodenum; 4: distal jejunum, 5: proximal ileum; 6: distal ileum; 7: ascending colon; 8: descending colon; 9: rectum.

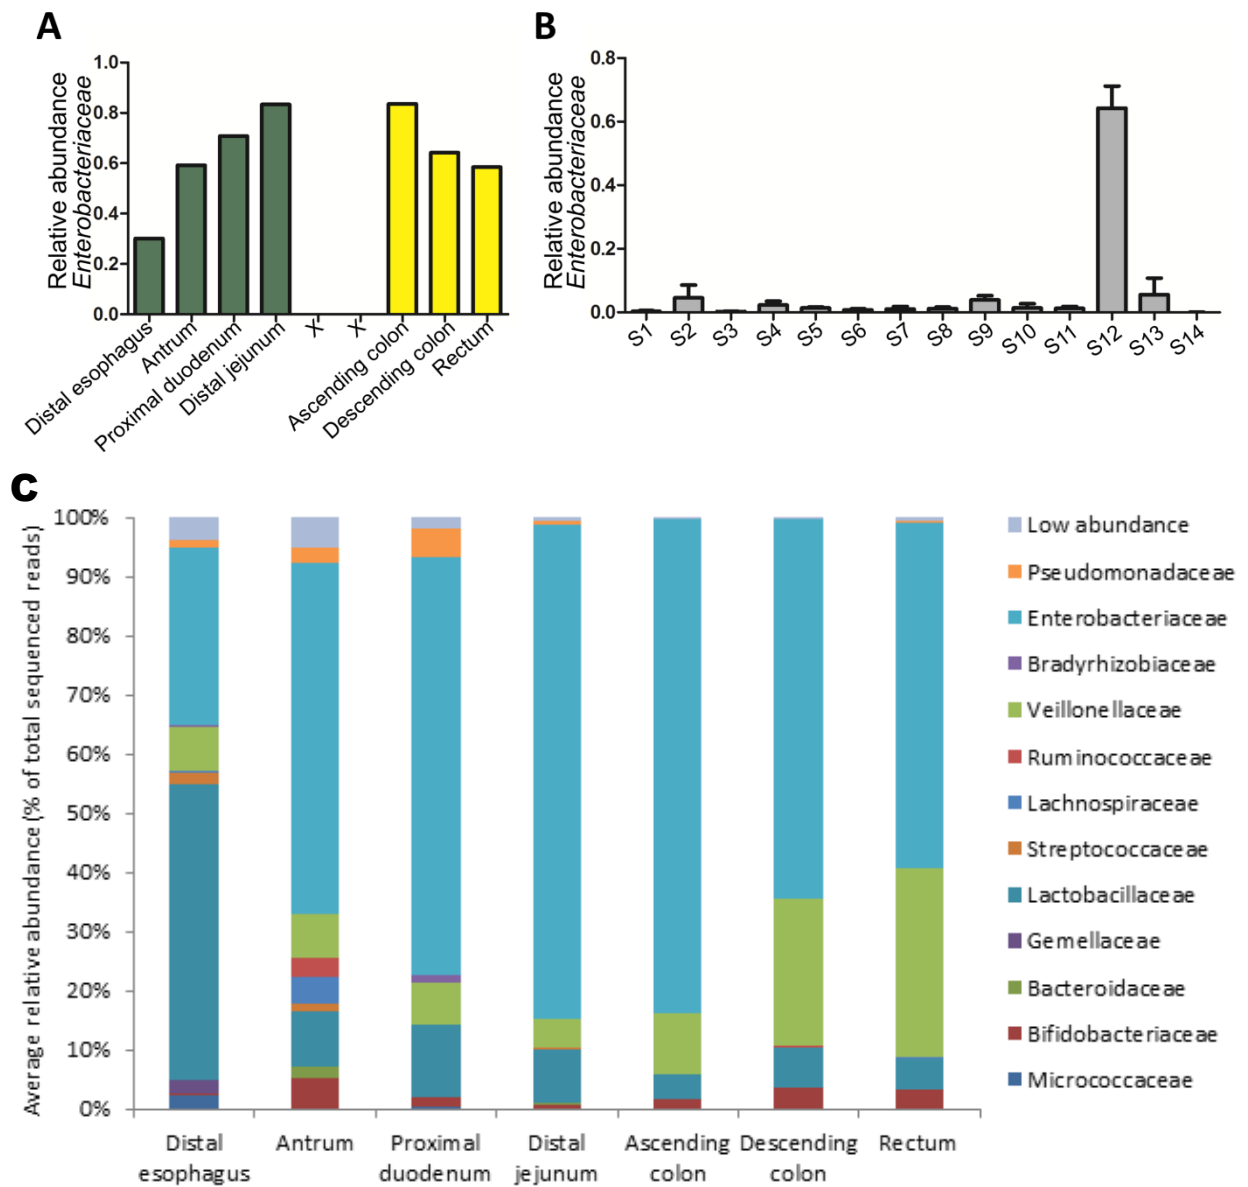

**Supplementary Figure S2: Abundance of *Enterobacteriaceae* at family level along the gastrointestinal tract** (A) Relative abundance of enterobacteriaceae in mucosal biopsies from a patient with a cecum tumor (S12) is shown. X: missing sample. Green: upper gastrointestinal locations. Yellow: lower gastrointestinal locations (B) Comparison of abundance of *Enterobacteriaceae* at family level between patients, mean $\pm$ SEM of all the GI locations are shown for subjects 1-14. (C) Most important bacteria at family level (>1% abundance) per location in patient with a cecum tumor.

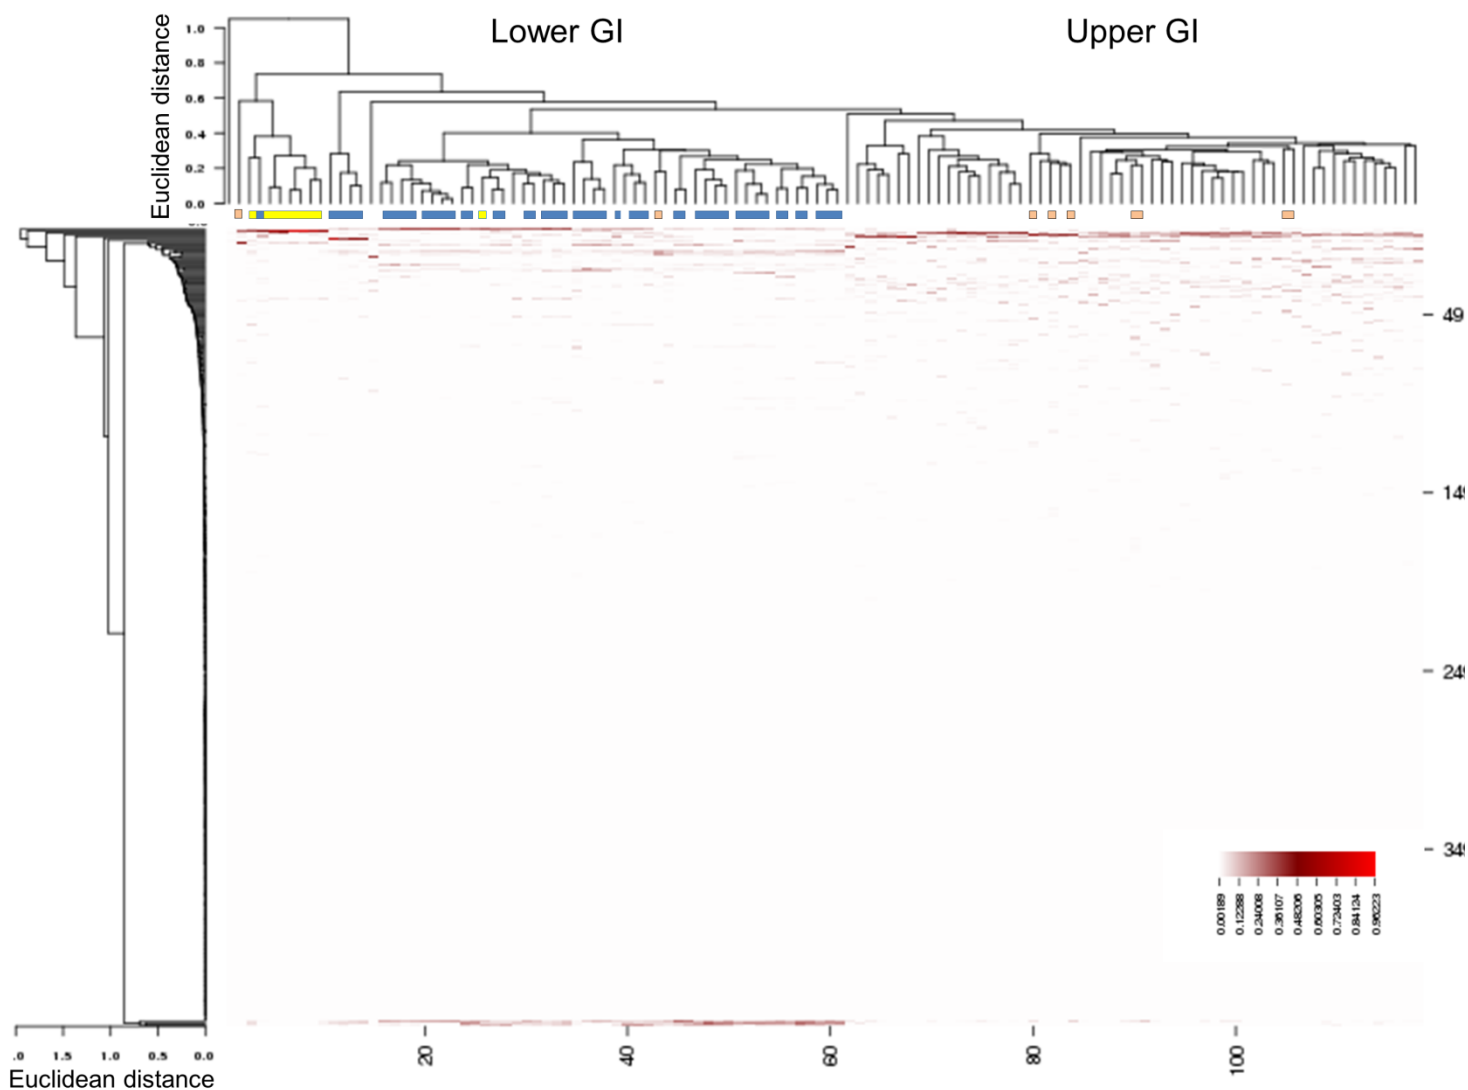

**Supplementary Figure S3: Cluster analysis of taxonomy at family level demonstrating the clustering per patients and the upper and lower digestive tract.** Samples indicated with yellow box were from patient 12, who was characterized *Enterobacteriaceae* dominance. The utmost left sample was a *Helicobacter*-dominated sample from patient 6 (indicated in orange). Blue boxes indicate clustering of two or more samples from one individual patient.

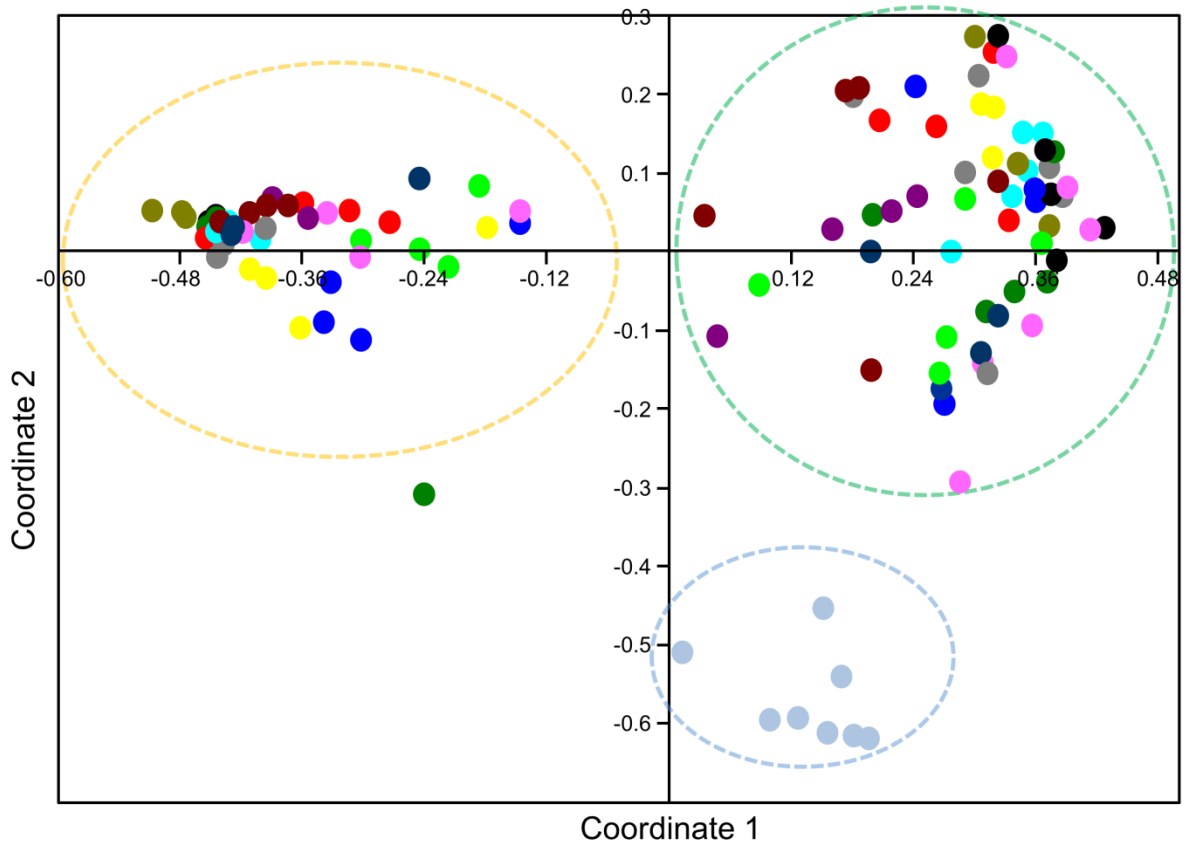

**Supplementary Figure S4: Principal coordinate analysis (PCoA) plot of Bray curtis distances.**

Similar to **Figure 4**, but now the different coloured dots represent different patients. Egg blue dots circled in blue indicate subject S12, dominated by by *Enterobacteriaceae*. In the left cluster (lower GI, circled in yellow), individual patient samples appear to lie closer together than in the right cluster (upper GI, circled in green).

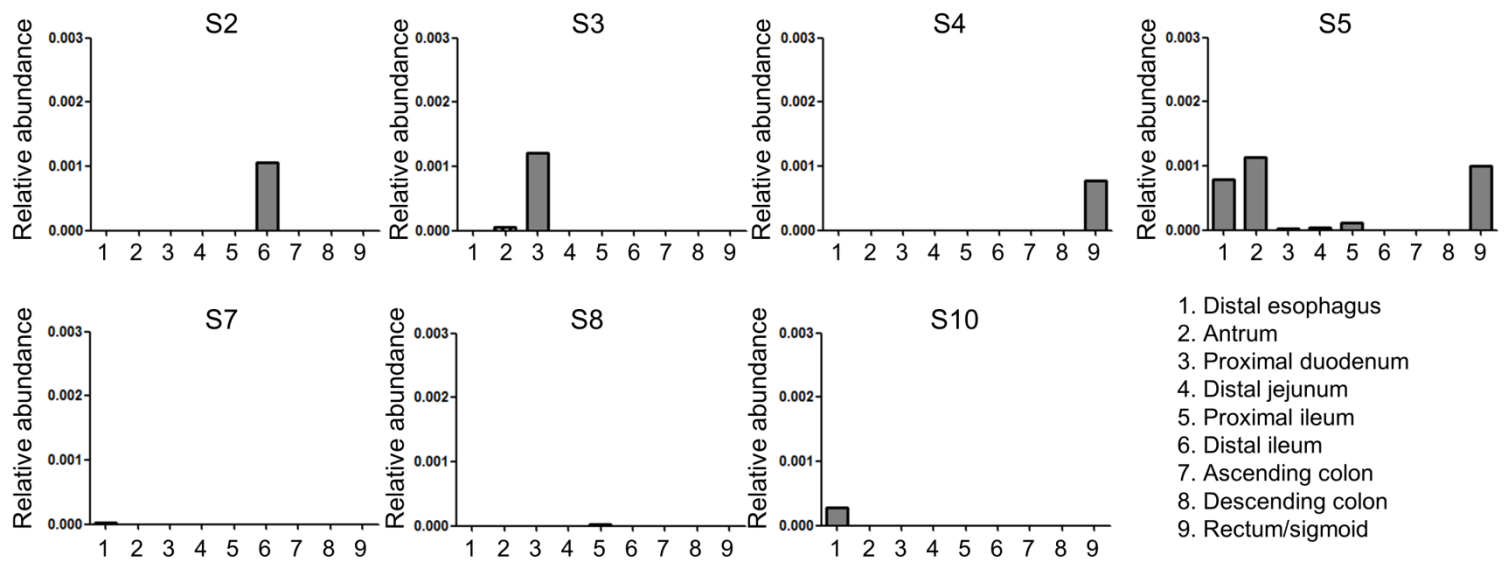

**Supplementary Figure S5. Relative abundance of *Helicobacter* species across the different GI sites.** *Helicobacter* was detected in 9 subjects. The relative abundance of *Helicobacteraceae* as detected by sequencing are shown here for individual GI locations of 7 subjects. Subjects S6 and S14 are shown in Figure 7.



## References

25. Suzuki MT, Taylor LT, DeLong EF. Quantitative analysis of small-subunit rRNA genes in mixed microbial populations via 5'-nuclease assays. *Appl Environ Microbiol.* 2000;66(11):4605-14.
26. Rodes L, Saha S, Tomaro-Duchesneau C, Prakash S. Microencapsulated *Bifidobacterium longum* subsp. *infantis* ATCC 15697 favorably modulates gut microbiota and reduces circulating endotoxins in F344 rats. *Biomed Res Int.* 2014;2014:602832.
27. Furet JP, Firmesse O, Gourmelon M, Bridonneau C, Tap J, Mondot S, et al. Comparative assessment of human and farm animal faecal microbiota using real-time quantitative PCR. *FEMS Microbiol Ecol.* 2009;68(3):351-62.
28. van Vliet AH, Kuipers EJ, Stoof J, Poppelaars SW, Kusters JG. Acid-responsive gene induction of ammonia-producing enzymes in *Helicobacter pylori* is mediated via a metal-responsive repressor cascade. *Infect Immun.* 2004;72(2):766-73.
29. van Vliet AH, Kuipers EJ, Waidner B, Davies BJ, de Vries N, Penn CW, et al. Nickel-responsive induction of urease expression in *Helicobacter pylori* is mediated at the transcriptional level. *Infect Immun.* 2001;69(8):4891-7.
30. Kim JW, Kim JG, Chae SL, Cha YJ, Park SM. High prevalence of multiple strain colonization of *Helicobacter pylori* in Korean patients: DNA diversity among clinical isolates from the gastric corpus, antrum and duodenum. *Korean J Intern Med.* 2004;19(1):1-9.
31. Vandesompele J, De Preter K, Pattyn F, Poppe B, Van Roy N, De Paepe A, et al. Accurate normalization of real-time quantitative RT-PCR data by geometric averaging of multiple internal control genes. *Genome Biol.* 2002;3(7):RESEARCH0034.
